# Supplementary material for: Urinary Microbiome and Psychological Factors in Women with Overactive Bladder
Source: PubMed Central journal article supplement (PMC5712163; doi:10.3389/fcimb.2017.00488), 2017-11-27
Supplement: Table2.pdf [file Table2.pdf]

Supplementary table 2- The indices of bacterial alpha diversity in all samples

| ID    | Chao1   | Observed Spec | Shannon | Simpson | Pielous |
|-------|---------|---------------|---------|---------|---------|
| OAB1  | 1532.32 | 748           | 3.74    | 0.68    | 0.47    |
| OAB2  | 1305.3  | 959           | 4.4     | 0.72    | 0.38    |
| OAB3  | 795.68  | 550           | 3.81    | 0.77    | 0.38    |
| OAB4  | 1225    | 504           | 3.84    | 0.86    | 0.36    |
| OAB5  | 515.33  | 329           | 1.76    | 0.36    | 0.76    |
| OAB6  | 592.25  | 388           | 3.81    | 0.83    | 0.74    |
| OAB7  | 1298.33 | 770           | 6.04    | 0.94    | 0.51    |
| OAB8  | 667.28  | 291           | 1.76    | 0.43    | 0.03    |
| OAB9  | 2532.05 | 624           | 2.83    | 0.62    | 0.34    |
| OAB10 | 4646.11 | 1328          | 5.72    | 0.94    | 0.14    |
| OAB11 | 1911.42 | 1024          | 5.05    | 0.87    | 0.61    |
| OAB12 | 290.1   | 101           | 0.6     | 0.14    | 0.01    |
| OAB13 | 3483.88 | 1061          | 5.07    | 0.89    | 0.27    |
| OAB14 | 2867.34 | 926           | 4.88    | 0.92    | 0.29    |
| OAB15 | 4250.45 | 1094          | 5.05    | 0.89    | 0.26    |
| OAB16 | 1130    | 415           | 1.58    | 0.33    | 0.47    |
| OAB17 | 1920.92 | 870           | 5.15    | 0.9     | 0.62    |
| OAB18 | 513.28  | 243           | 1.53    | 0.44    | 0.13    |
| OAB19 | 3665.32 | 1184          | 5.22    | 0.92    | 0.01    |
| OAB20 | 3669.6  | 1205          | 5.36    | 0.92    | 0.22    |
| OAB21 | 1287    | 577           | 3.91    | 0.79    | 0.17    |
| OAB22 | 1817.01 | 657           | 4.36    | 0.89    | 0.64    |
| OAB23 | 2248.03 | 1515          | 6.5     | 0.92    | 0.70    |
| OAB24 | 1976.03 | 821           | 4.76    | 0.89    | 0.15    |
| OAB25 | 5056.78 | 1751          | 5.5     | 0.89    | 0.32    |
| OAB26 | 2383.37 | 1618          | 5.71    | 0.79    | 0.25    |
| OAB27 | 374.83  | 226           | 1.61    | 0.34    | 0.02    |
| OAB28 | 1713.09 | 1113          | 4.58    | 0.73    | 0.40    |
| OAB29 | 1064.34 | 678           | 5.84    | 0.89    | 0.58    |
| OAB30 | 1373.94 | 727           | 4.81    | 0.85    | 0.34    |
| C1    | 652.7   | 319           | 3.18    | 0.75    | 0.60    |
| C2    | 4945.9  | 1983          | 6.44    | 0.95    | 0.26    |
| C3    | 2429.67 | 934           | 3.5     | 0.75    | 0.52    |
| C4    | 1794.45 | 1338          | 8.13    | 0.97    | 0.31    |
| C5    | 1719.16 | 655           | 2.74    | 0.57    | 0.58    |
| C6    | 1365.14 | 730           | 4.73    | 0.91    | 0.32    |
| C7    | 3573.66 | 1446          | 5.83    | 0.93    | 0.31    |
| C8    | 3635.21 | 809           | 2.87    | 0.6     | 0.17    |
| C9    | 1603.96 | 1049          | 4.18    | 0.69    | 0.73    |
| C10   | 2011.44 | 743           | 4.8     | 0.89    | 0.45    |
| C11   | 1608.89 | 570           | 3.76    | 0.81    | 0.44    |
| C12   | 5586.45 | 1982          | 6.84    | 0.97    | 0.33    |
| C13   | 4529.99 | 1374          | 5.57    | 0.93    | 0.75    |

|     |         |      |      |      |      |
|-----|---------|------|------|------|------|
| C14 | 6075.53 | 2182 | 6.9  | 0.97 | 0.33 |
| C15 | 2946.63 | 1120 | 5.95 | 0.96 | 0.54 |
| C16 | 660.53  | 362  | 2.8  | 0.71 | 0.27 |
| C17 | 1674.29 | 632  | 4.33 | 0.85 | 0.59 |
| C18 | 1086.41 | 541  | 3.7  | 0.82 | 0.20 |
| C19 | 6817.21 | 2384 | 7.17 | 0.98 | 0.38 |
| C20 | 1340.22 | 614  | 3.77 | 0.82 | 0.17 |
| C21 | 3425.63 | 915  | 4.56 | 0.86 | 0.76 |
| C22 | 3837.43 | 2823 | 9.19 | 0.98 | 0.46 |
| C23 | 2026.46 | 800  | 4.77 | 0.88 | 0.51 |
| C24 | 2092.89 | 762  | 4.49 | 0.9  | 0.25 |
| C25 | 2810.04 | 2038 | 9.05 | 0.99 | 0.38 |
