# Supplementary material for: Urinary Microbiome and Psychological Factors in Women with Overactive Bladder
Source: PubMed Central journal article supplement (PMC5712163; doi:10.3389/fcimb.2017.00488), 2017-11-27
Supplement: Table3.pdf [file Table3.pdf]

Supplementary table 3 - Differences between these two OAB subgroups based on hierarchical clustering of weighted UniFrac distance metric

| Variables            | OAB patients in cluster 1 and cluster 3 | OAB patients in cluster 2 | <i>P</i> value |
|----------------------|-----------------------------------------|---------------------------|----------------|
|                      | (n=16)                                  | (n=14)                    |                |
| BMI                  | 20.70                                   | 20.24                     | 0.56           |
| Age (y)              | 35.44                                   | 29.36                     | 0.14           |
| OABSS                | 8.00                                    | 7.50                      | 0.54           |
| Daytime frequency    | 1.75                                    | 1.57                      | 0.32           |
| Nighttime frequency  | 2.06                                    | 2.21                      | 0.58           |
| Urgency              | 3.75                                    | 3.50                      | 0.61           |
| Urgency incontinence | 0.56                                    | 0.21                      | 0.40           |
| SDS                  | 53.61                                   | 49.54                     | 0.21           |
| SAS                  | 52.59                                   | 50.58                     | 0.52           |
| Chao1                | 1921.74                                 | 1954.18                   | 0.95           |
| Observed Species     | 845.94                                  | 768.71                    | 0.63           |
| Shannon              | 4.61                                    | 3.64                      | 0.10           |
| Simpson              | 0.66                                    | 0.82                      | 0.07           |
| Pielous              | 0.41                                    | 0.28                      | 0.10           |
